# Supplementary material for: Impact of the First COVID-19 Wave on French Hospitalizations for Myocardial Infarction and Stroke: A Retrospective Cohort Study
Source: MDPI journal article supplement (doi:10.3390/biomedicines10102501), 2022-10-07

## Supplementary file

### Impact of the first COVID-19 wave on French hospitalizations for Myocardial infarction and Stroke: a retrospective cohort study

Anne-Sophie Mariet<sup>1,2</sup>. Gauthier Duloquin<sup>3,4</sup>. Eric Benzenine<sup>1</sup>. Adrien Roussot<sup>1</sup>. Thibaut Pommier<sup>5</sup>. Jean-Christophe Eicher<sup>5</sup>. Laura Baptiste<sup>3,4</sup>. Maurice Giroud<sup>3,4</sup>. Yves Cottin<sup>5,6,7</sup>. Yannick Béjot<sup>3,4</sup>. Catherine Quantin<sup>1,2,8</sup>

1. Biostatistics and Bioinformatics (DIM). University Hospital of Dijon. France
2. CIC1432. University Hospital of Dijon. Clinical Investigation Center. Clinical Epidemiology/Clinical Trials Unit. Dijon. France
3. Neurology Department. University Hospital of Dijon. France
4. Dijon Stroke Registry (Santé Publique France – Inserm) - EA 7460 (Pathophysiology and Epidemiology of Cerebro-CardioVascular Diseases). University of Burgundy. UFBC. Dijon. France
5. Cardiology Department. University Hospital of Dijon. France
6. Pathophysiology and Epidemiology of Cerebro-CardioVascular Diseases. University of Burgundy. Dijon. France
7. Registre des Infarctus du Myocarde de Côte d'Or. University Hospital of Dijon. France
8. Université Paris-Saclay. UVSQ. University of Paris-Sud. Inserm. High-Dimensional Biostatistics for Drug Safety and Genomics. CESP. Villejuif. France

Supplementary Figure S1. Trends of hospital admissions for myocardial infarction and its subtypes including cases associated with COVID-19 in January to September 2020 compared to 2019

Supplementary Figure S2. Trends of hospital admissions for cerebrovascular events and its subtypes including cases associated with COVID-19 in January to September 2020 compared to 2019

Supplementary Table S1. Crude and standardized rates of hospitalizations for cerebro-cardiovascular event in France in 2020 before, during and after the first lockdown

Supplementary Table S2. Interrupted time series analyses of hospitalizations for cerebro-cardiovascular events for weeks 2 to 39 of 2020 in France, with three periods: before, during and after the lockdown (weeks 12 to 19)

Supplementary Figure S3. Observed (Obs) and predicted (ITS) hospitalizations for cardiovascular events for weeks 2 to 39 of 2020 in France, interrupted time series (ITS) analysis with three periods (before, during, after the first lockdown)

Supplementary Figure S4. Observed (Obs) and predicted (ITS) hospitalizations for cerebrovascular events for weeks 2 to 39 of 2020 in France, interrupted time series (ITS) analyses with three periods (before, during, after the first lockdown)

Supplementary Figure S1. Trends of hospital admissions for myocardial infarction and its subtypes including cases associated with COVID-19 in January to September 2020 compared to 2019

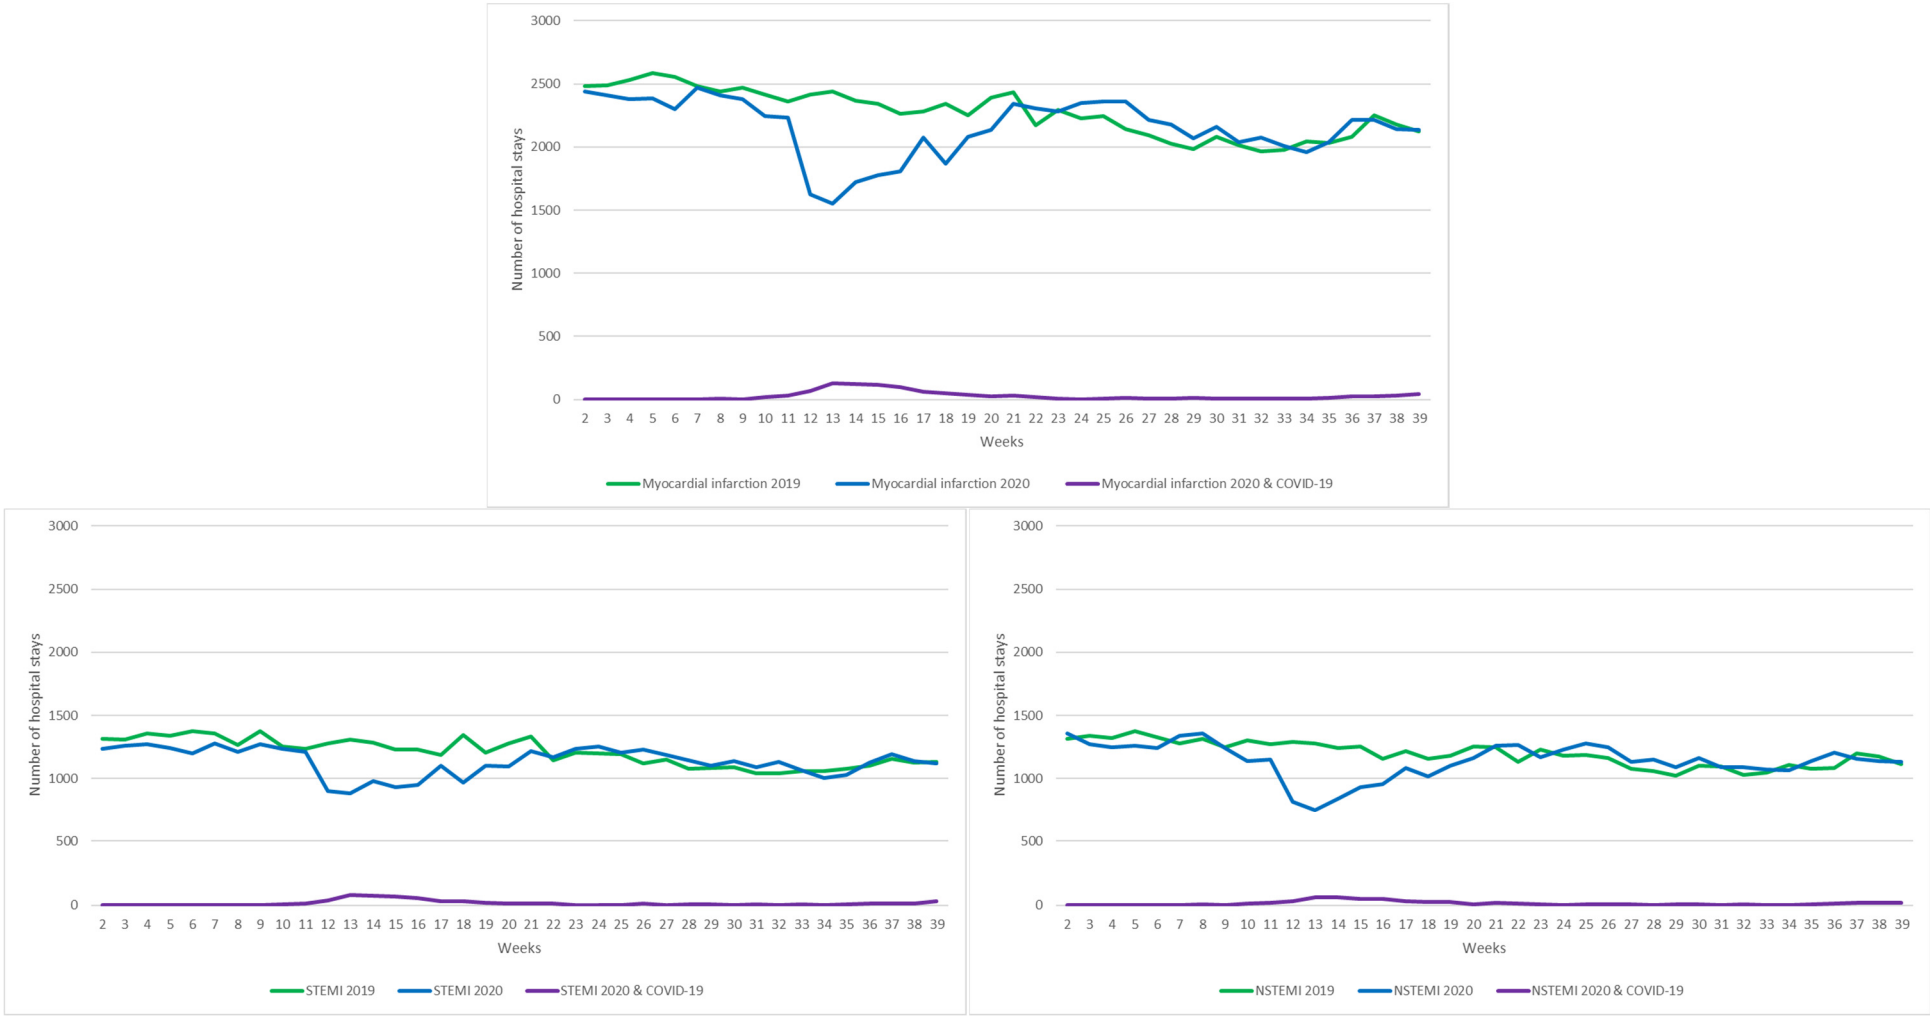

Supplementary Figure S2. Trends of hospital admissions for cerebrovascular events and its subtypes including cases associated with COVID-19 in January to September 2020 compared to 2019

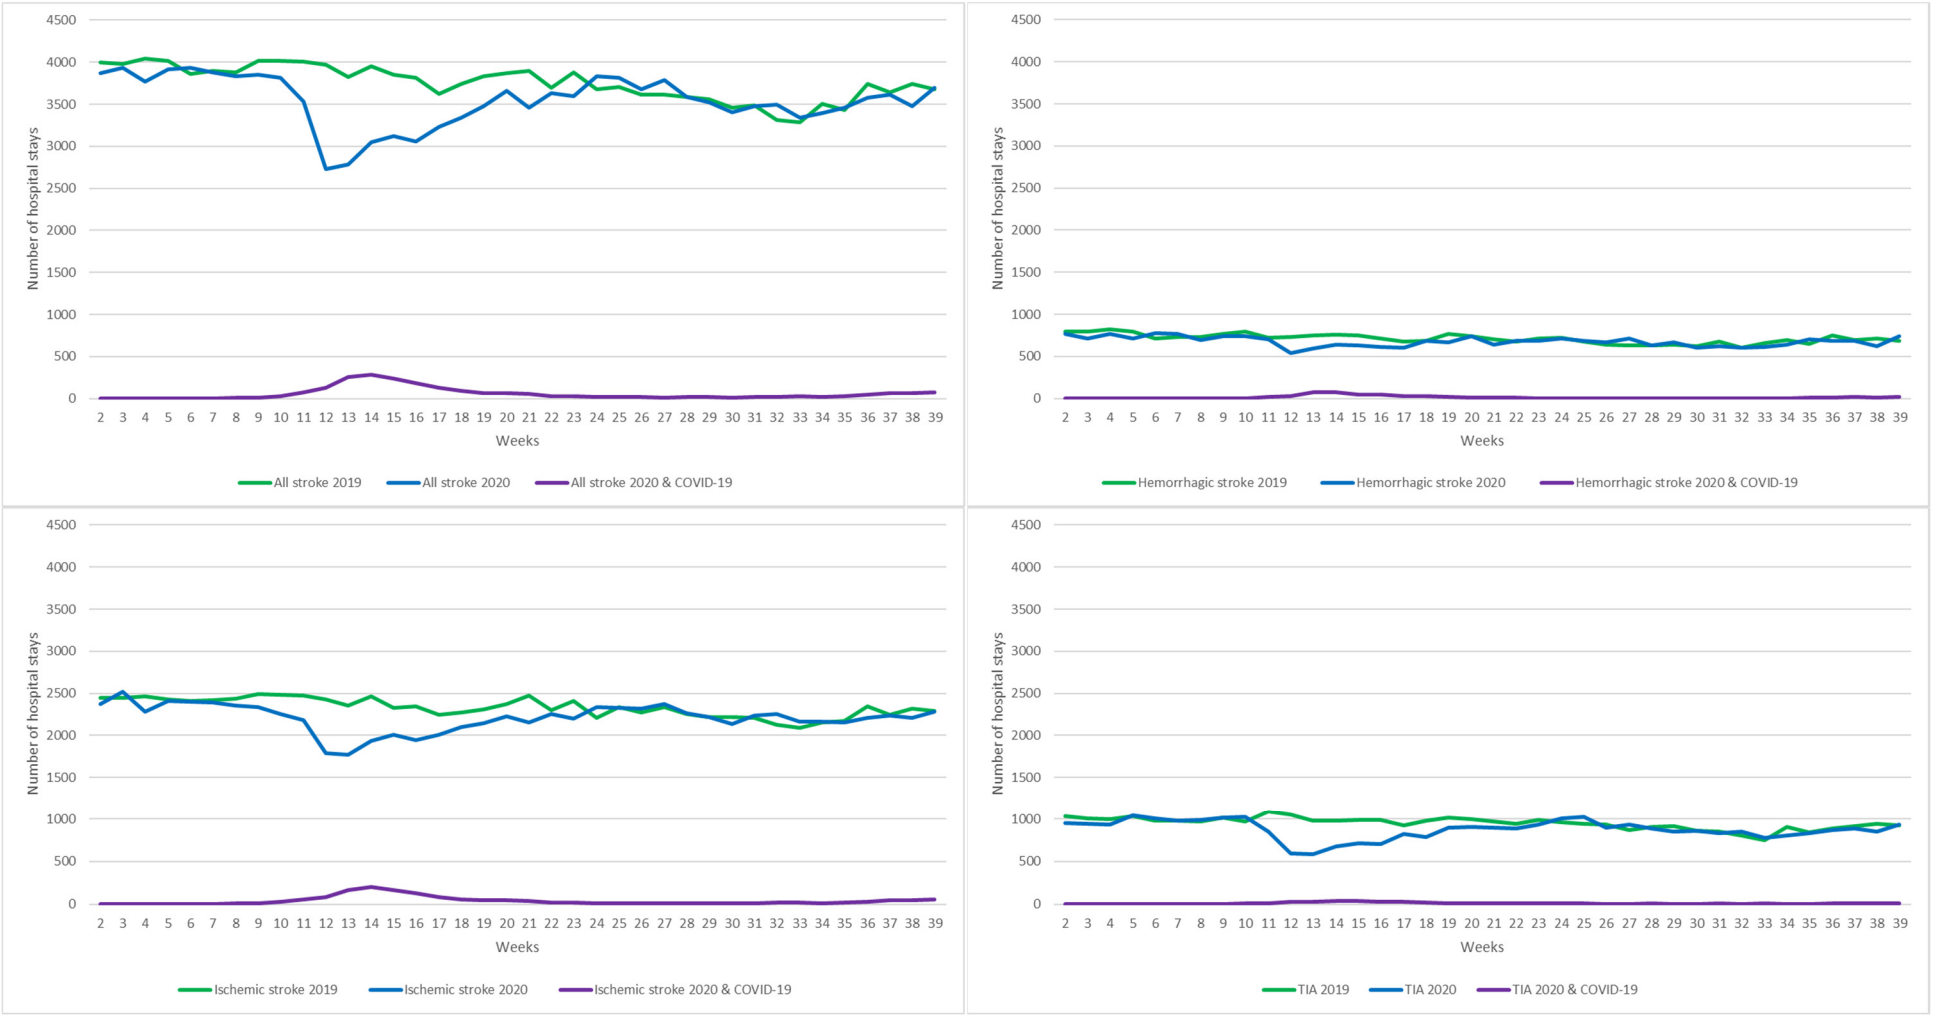

**Supplementary Table S1. Crude and standardized rates of hospitalizations for cerebro-cardiovascular event in France in 2020 before, during and after the first lockdown**

| Hospitalizations for:     | Crude rate<br>(per 100.000 persons-<br>months) |                     |                    | Standardized rate on<br>European population<br>(per 100.000 persons-<br>months) |                     |                    | Standardized rate on<br>world population<br>(per 100.000 persons-<br>months) |                     |                    |
|---------------------------|------------------------------------------------|---------------------|--------------------|---------------------------------------------------------------------------------|---------------------|--------------------|------------------------------------------------------------------------------|---------------------|--------------------|
|                           | Before <sup>a</sup>                            | During <sup>b</sup> | After <sup>c</sup> | Before <sup>a</sup>                                                             | During <sup>b</sup> | After <sup>c</sup> | Before <sup>a</sup>                                                          | During <sup>b</sup> | After <sup>c</sup> |
| All myocardial infarction | 19.9                                           | 15.3                | 18.5               | 13.9                                                                            | 10.9                | 13.0               | 11.2                                                                         | 8.8                 | 10.5               |
| STEMI                     | 10.5                                           | 8.3                 | 9.7                | 7.6                                                                             | 6.1                 | 7.1                | 6.2                                                                          | 5.0                 | 5.8                |
| NSTEMI                    | 10.6                                           | 7.9                 | 9.9                | 7.1                                                                             | 5.4                 | 6.7                | 5.6                                                                          | 4.2                 | 5.3                |
| All stroke                | 32.2                                           | 26.3                | 30.4               | 20.1                                                                            | 16.3                | 12.3               | 15.7                                                                         | 12.7                | 15.2               |
| Ischemic stroke           | 19.8                                           | 16.6                | 19.0               | 11.9                                                                            | 10.0                | 11.7               | 9.2                                                                          | 7.7                 | 9.1                |
| Hemorrhagic stroke        | 6.2                                            | 5.3                 | 5.7                | 4.2                                                                             | 3.5                 | 3.9                | 3.4                                                                          | 2.8                 | 3.2                |
| Transient ischemic attack | 8.1                                            | 6.1                 | 7.5                | 5.2                                                                             | 3.9                 | 4.9                | 4.2                                                                          | 3.1                 | 3.9                |

STEMI: ST segment elevation myocardial infarction; NSTEMI: non-ST segment elevation myocardial infarction

<sup>a</sup> before lockdown. i.e. January 1<sup>st</sup> to March 16<sup>th</sup> 2020

<sup>b</sup> during the lockdown. i.e. 17<sup>th</sup> March to May 10<sup>th</sup> 2020

<sup>c</sup> after the lockdown. i.e. May 11<sup>th</sup> to September 30<sup>th</sup> 2020

**Supplementary Table S2. Interrupted time series analyses of hospitalizations for cerebro-cardiovascular events for weeks 2 to 39 of 2020 in France. with three periods: before. during and after the lockdown (weeks 12 to 19)**

| Hospitalization for:      | Variable                            | Estimate   | Standard Error | P-value           |
|---------------------------|-------------------------------------|------------|----------------|-------------------|
| Myocardial infarction     | Intercept                           | 0.0047800  | 0.0001260      | <10 <sup>-4</sup> |
|                           | Slope before lockdown               | -0.0000330 | 0.0000203      | 0.1179            |
|                           | Level change during/before lockdown | -0.0013700 | 0.0001730      | <10 <sup>-4</sup> |
|                           | Slope during lockdown               | 0.0001690  | 0.0000349      | <10 <sup>-4</sup> |
|                           | Level change after/during lockdown  | 0.0003210  | 0.0001640      | 0.0593            |
|                           | Slope after lockdown                | -0.0001600 | 0.0000293      | <10 <sup>-4</sup> |
| STEMI                     | Intercept                           | 0.0024400  | 0.0000713      | <10 <sup>-4</sup> |
|                           | Slope before lockdown               | -0.0000046 | 0.0000115      | 0.6938            |
|                           | Level change during/before lockdown | -0.0006690 | 0.0000981      | <10 <sup>-4</sup> |
|                           | Slope during lockdown               | 0.0000562  | 0.0000198      | 0.0077            |
|                           | Level change after/during lockdown  | 0.0002020  | 0.0000929      | 0.0374            |
|                           | Slope after lockdown                | -0.0000630 | 0.0000166      | 0.0006            |
| NSTEMI                    | Intercept                           | 0.0026090  | 0.0000773      | <10 <sup>-4</sup> |
|                           | Slope before lockdown               | -0.0000280 | 0.0000125      | 0.0291            |
|                           | Level change during/before lockdown | -0.0008050 | 0.0001060      | <10 <sup>-4</sup> |
|                           | Slope during lockdown               | 0.0001240  | 0.0000214      | <10 <sup>-4</sup> |
|                           | Level change after/during lockdown  | 0.0001240  | 0.0001010      | 0.2282            |
|                           | Slope after lockdown                | -0.0001070 | 0.0000180      | <10 <sup>-4</sup> |
| Stroke                    | Intercept                           | 0.0077020  | 0.0001550      | <10 <sup>-4</sup> |
|                           | Slope before lockdown               | -0.0000440 | 0.0000250      | 0.0864            |
|                           | Level change during/before lockdown | -0.0018750 | 0.0002130      | <10 <sup>-4</sup> |
|                           | Slope during lockdown               | 0.0002410  | 0.0000430      | <10 <sup>-4</sup> |
|                           | Level change after/during lockdown  | 0.0002040  | 0.0002020      | 0.3185            |
|                           | Slope after lockdown                | -0.0002140 | 0.0000361      | <10 <sup>-4</sup> |
| Hemorrhagic stroke        | Intercept                           | 0.0014730  | 0.0000513      | <10 <sup>-4</sup> |
|                           | Slope before lockdown               | -0.0000067 | 0.0000083      | 0.4269            |
|                           | Level change during/before lockdown | -0.0002880 | 0.0000706      | 0.0003            |
|                           | Slope during lockdown               | 0.0000349  | 0.0000142      | 0.0199            |
|                           | Level change after/during lockdown  | -0.0000140 | 0.0000668      | 0.8361            |
|                           | Slope after lockdown                | -0.0000310 | 0.0000119      | 0.0143            |
| Ischemic stroke           | Intercept                           | 0.0047980  | 0.0000878      | <10 <sup>-4</sup> |
|                           | Slope before lockdown               | -0.0000410 | 0.0000142      | 0.0072            |
|                           | Level change during/before lockdown | -0.0008810 | 0.0001210      | <10 <sup>-4</sup> |
|                           | Slope during lockdown               | 0.0001400  | 0.0000244      | <10 <sup>-4</sup> |
|                           | Level change after/during lockdown  | 0.0001350  | 0.0001140      | 0.2463            |
|                           | Slope after lockdown                | -0.0001040 | 0.0000205      | <10 <sup>-4</sup> |
| Transient ischemic attack | Intercept                           | 0.0019000  | 0.0000703      | <10 <sup>-4</sup> |
|                           | Slope before lockdown               | -0.0000017 | 0.0000113      | 0.8835            |
|                           | Level change during/before lockdown | -0.0007680 | 0.0000968      | <10 <sup>-4</sup> |
|                           | Slope during lockdown               | 0.0000845  | 0.0000195      | 0.0001            |
|                           | Level change after/during lockdown  | 0.0000324  | 0.0000917      | 0.7263            |
|                           | Slope after lockdown                | -0.0000920 | 0.0000164      | <10 <sup>-4</sup> |

**Supplementary Figure S3. Observed (Obs) and predicted (ITS) hospitalizations for cardiovascular events for weeks 2 to 39 of 2020 in France. interrupted time series (ITS) analysis with three periods (before. during. after the first lockdown)**

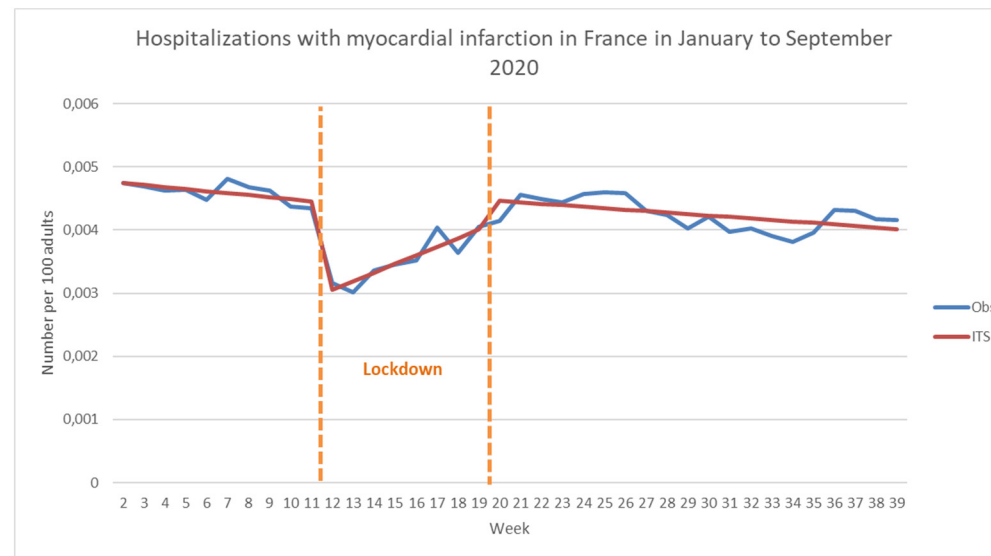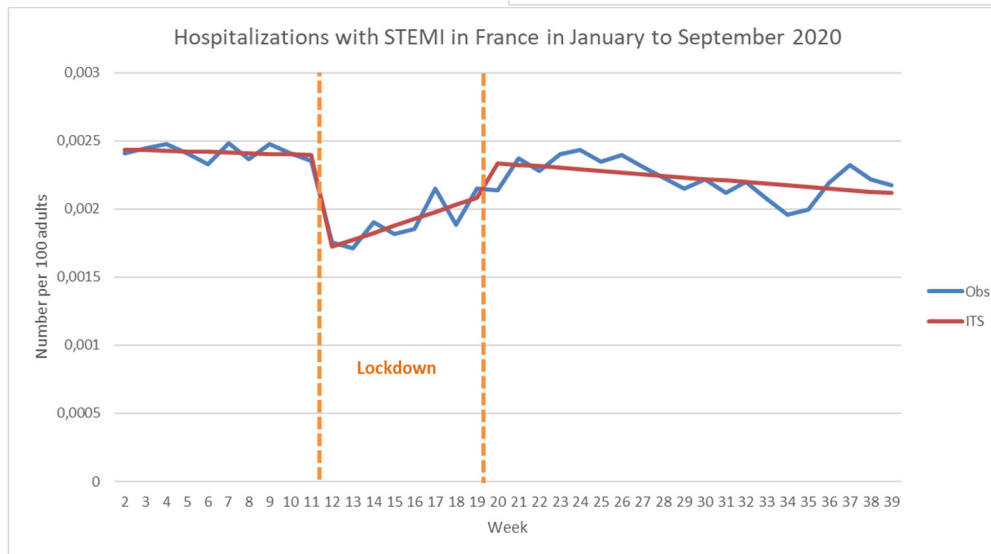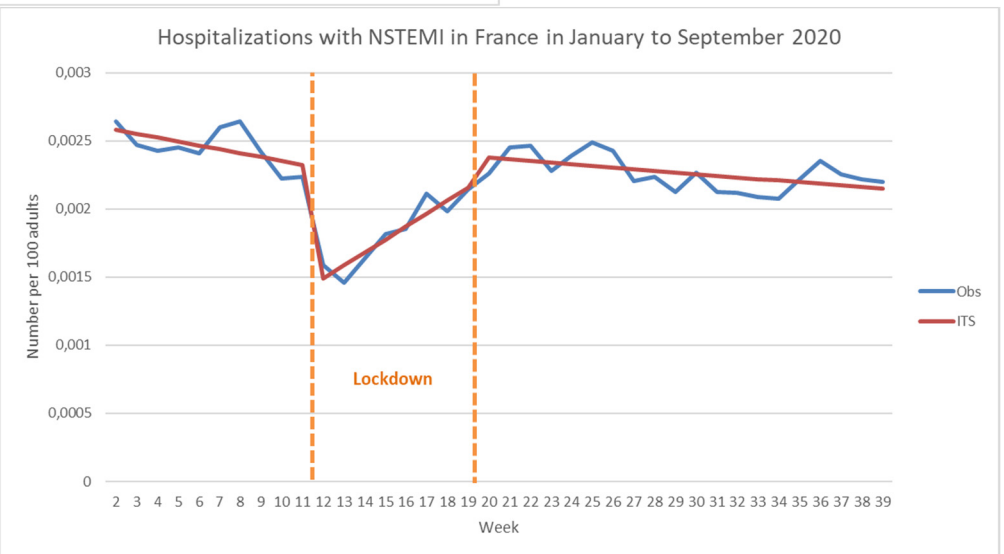

**Supplementary Figure S4. Observed (Obs) and predicted (ITS) hospitalizations for cerebrovascular events for weeks 2 to 39 of 2020 in France. interrupted time series (ITS) analyses with three periods (before, during, after the first lockdown)**

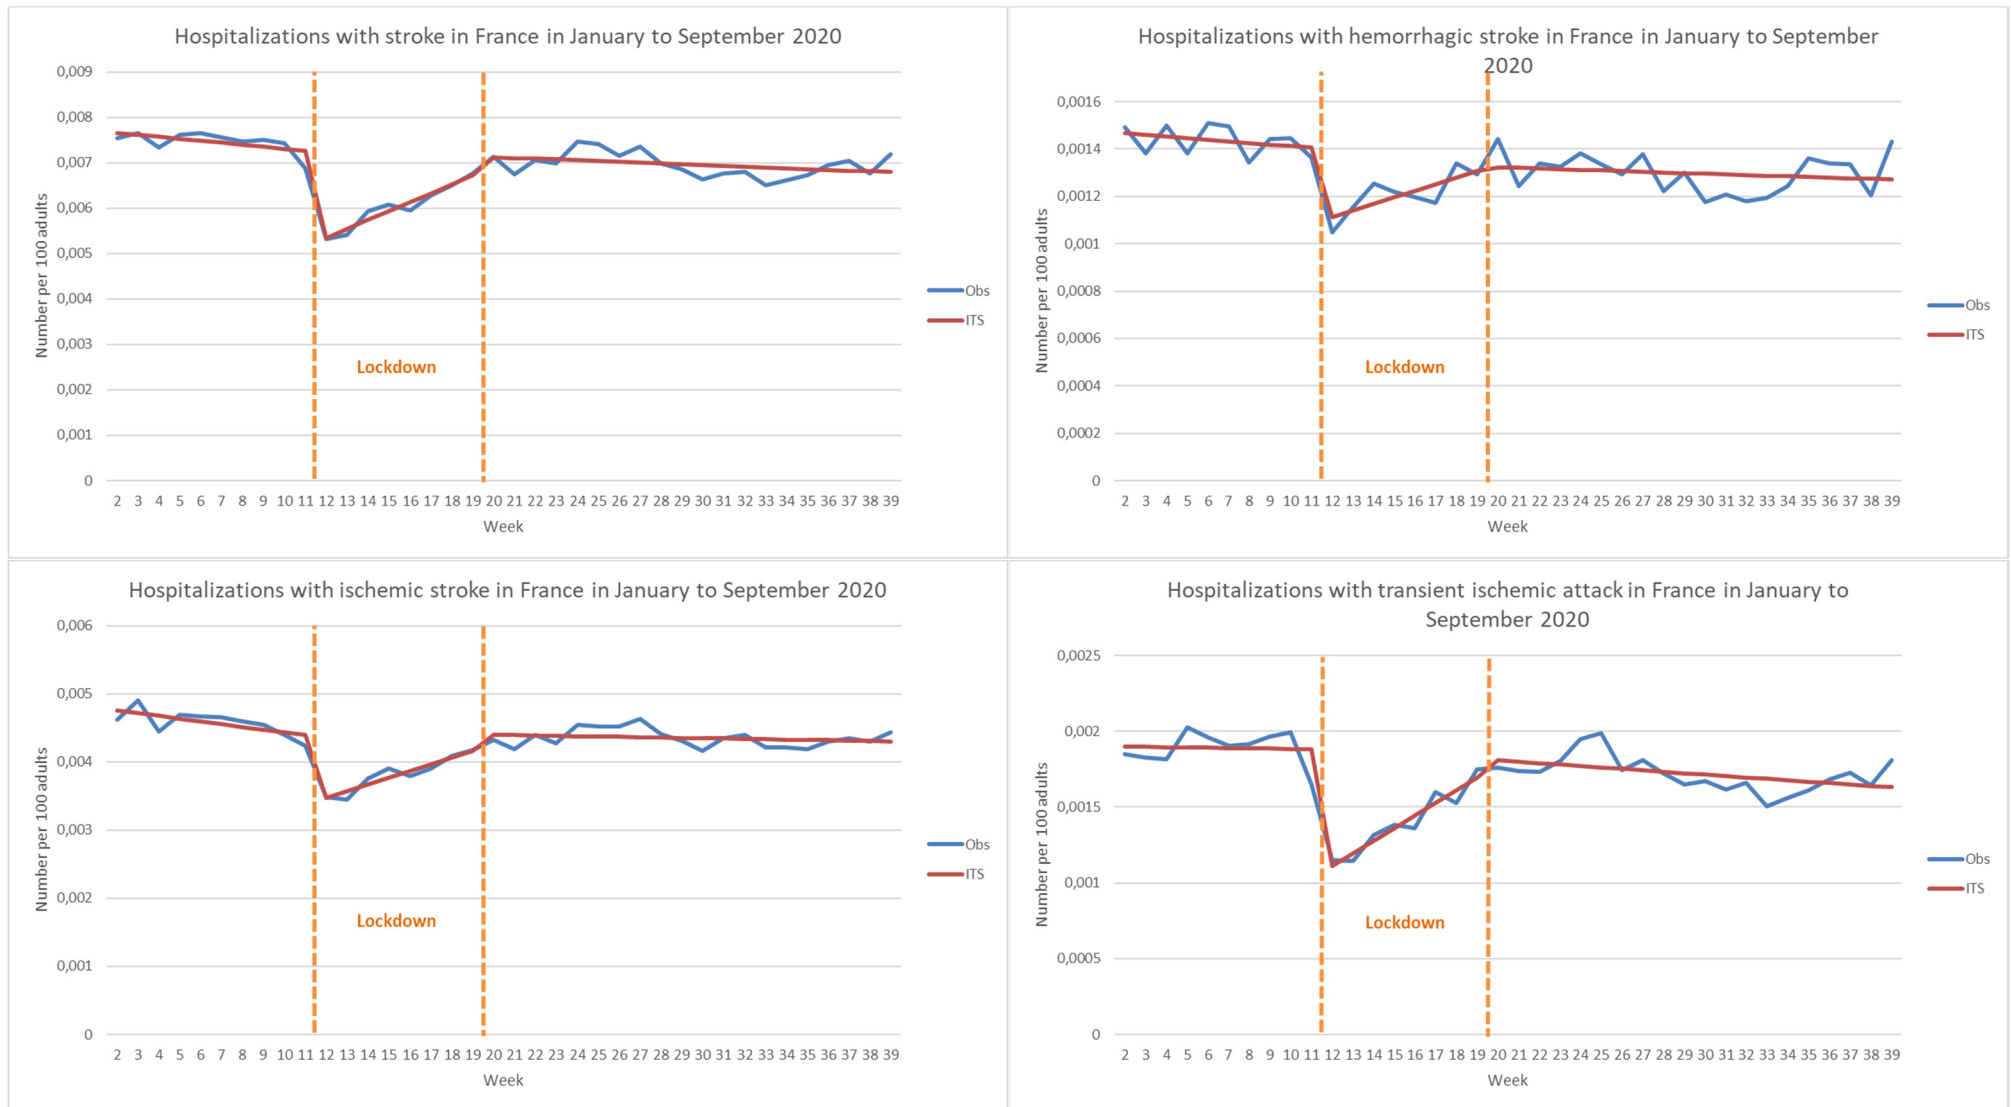

Supplement: s1 [file s1]
